# Supplementary material
Source: Springer Nature journal article supplement (https://www.springermedizin.de/resource/supplementary/13024_2009_77_MOESM1_ESM.pdf/9643332)

**A**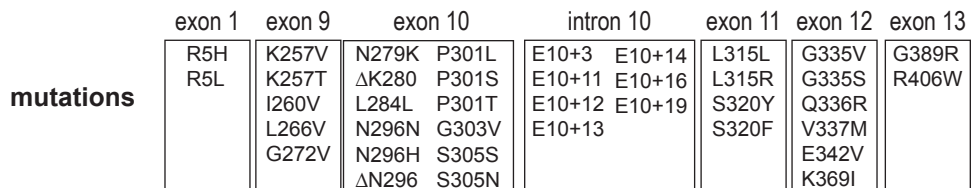**B****Tau gene**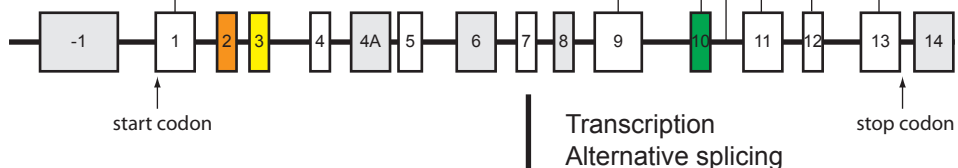**C****Tau mRNA**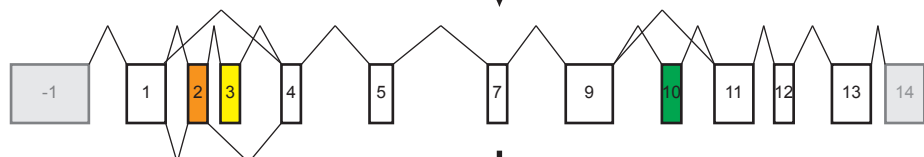

Translation

**D****3R-tau protein**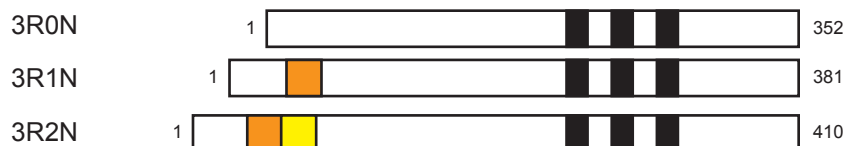**4R-tau protein**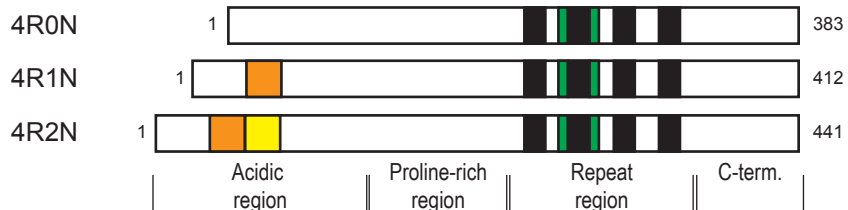**E****phosphorylation sites**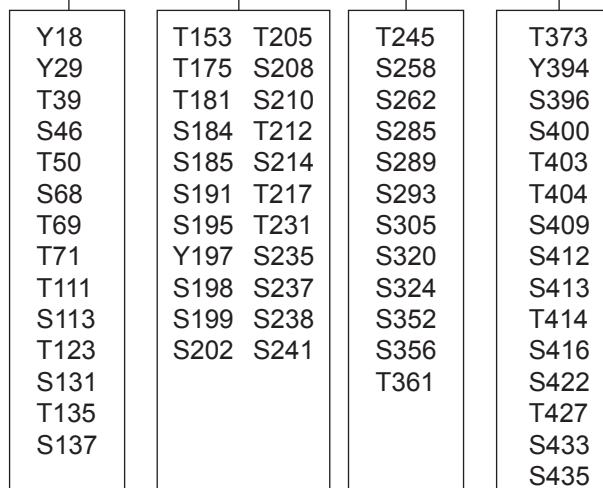

Supplement: MOESM1 [file 9643332]
